# Supplementary material
Source: Royal Society of Chemistry journal article supplement (doi:10.1039/d5tc04119h)
Supplement: d5tc04119h1.pdf [file d5tc04119h1.pdf]

Electronic Supplementary Information

for

## Exploring Pressure-Induced Phase Transitions in Imidazolium Lead Bromide Hybrids

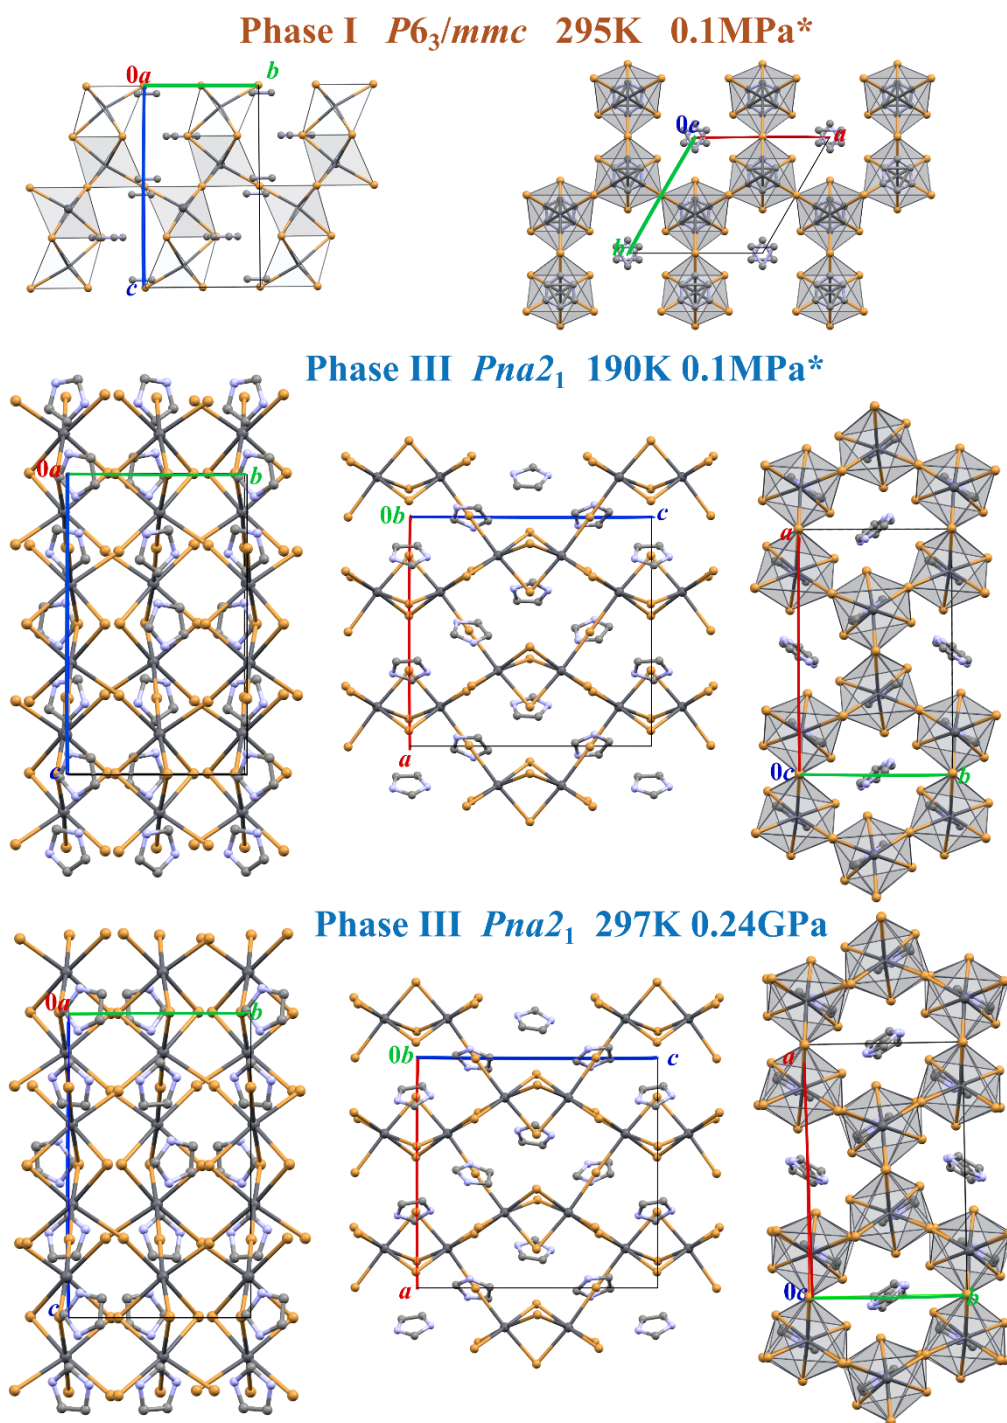

**Figure S1.** IMPbBr<sub>3</sub> structure in phases I and III along the three main crystallographic directions.

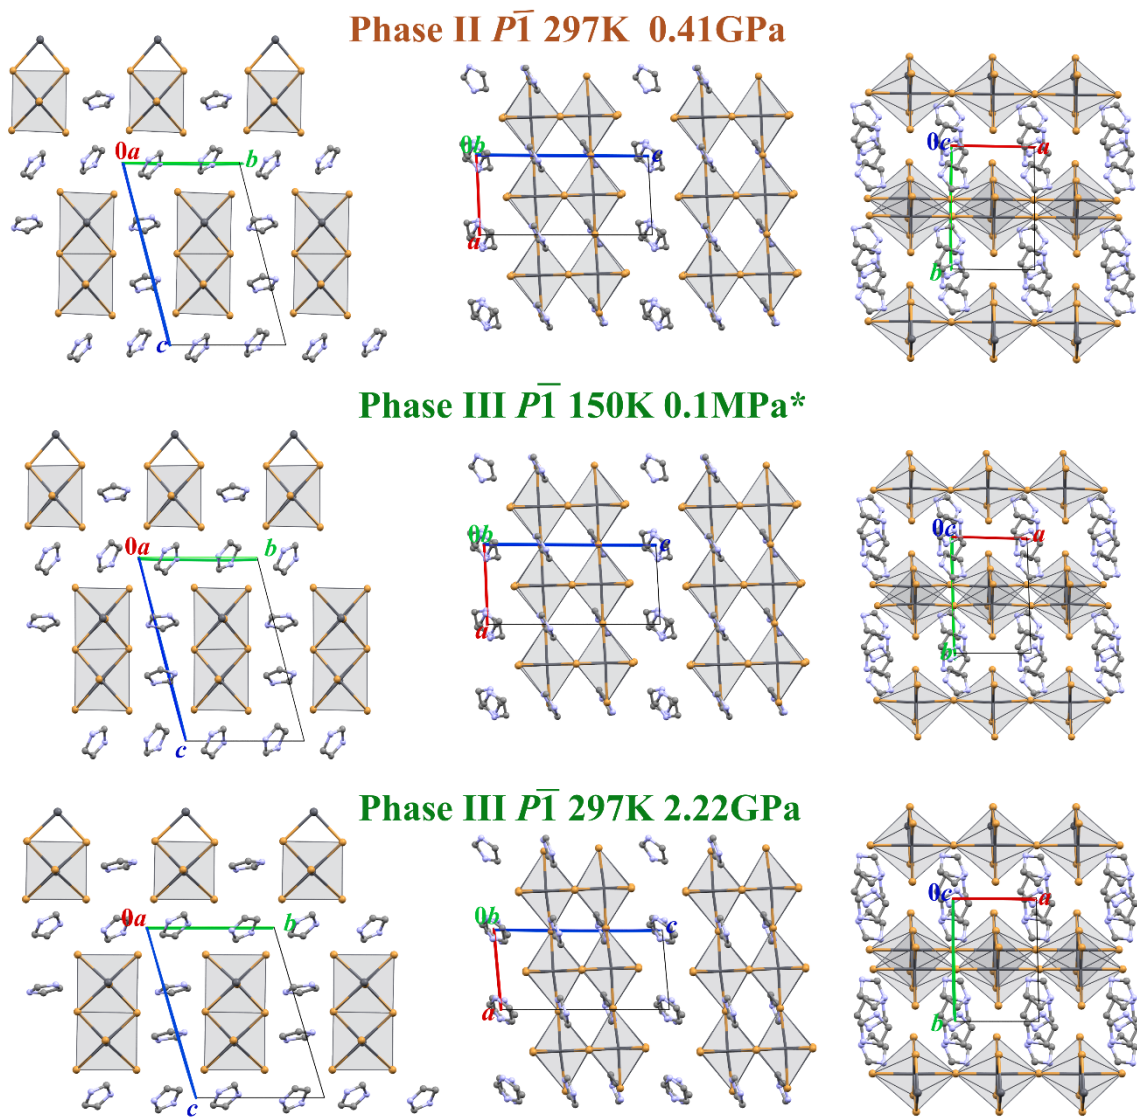

**Figure S2.**  $\text{IM}_2\text{PbBr}_4$  in phases II and III along the three main crystallographic directions.

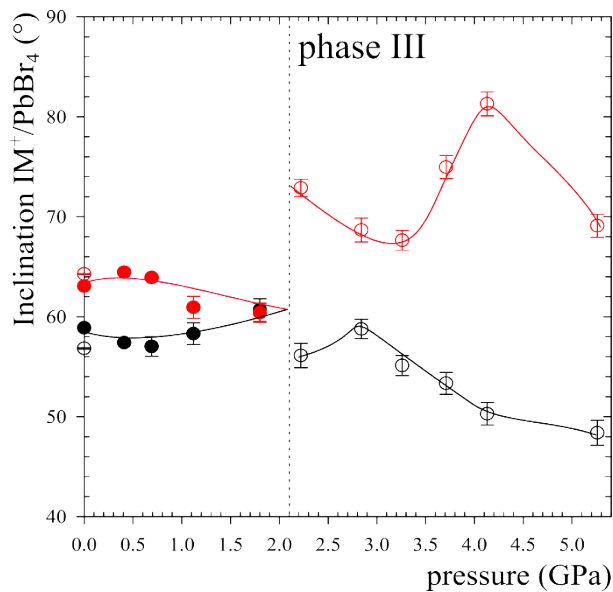

**Figure S3.** Inclination angle of the mean planes of two independent  $IM^+$  cations to the mean plane  $Pb_1-Br_3, Br_4, Br_1, Br_1$  in  $IM_2PbBr_4$ : phase II at 0.1 MPa/295 K (full circles); phase III at 0.1 MPa/150 K (open circles); at high pressure the values of suggested phases II and III are marked by open and full symbols, respectively. The vertical dashed line indicates the transition between phases II and III.

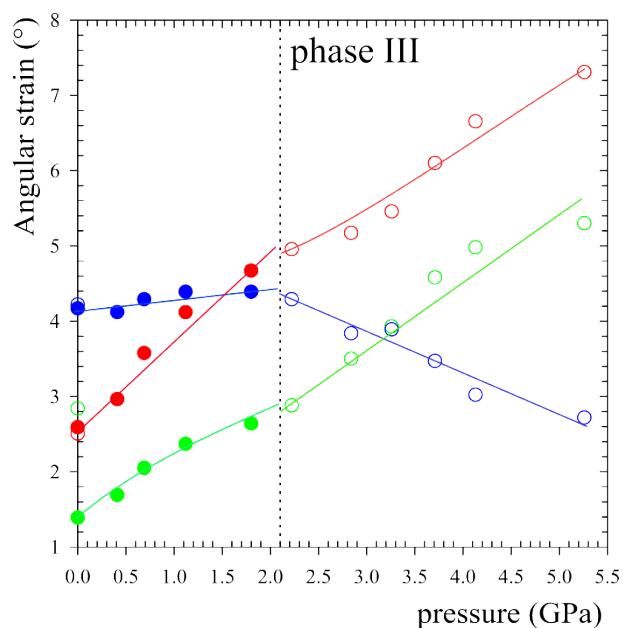

**Figure S4.** Triclinic strain calculated for the  $Im_2PbBr_4$  crystal as the deviations of the unit-cell angles for the lattices transformed into the orthorhombic phase I (according to matrix  $M^{-1}$ -see Equation 1):  $|90^\circ-\alpha_i|$  - red;  $|90^\circ-\beta_i|$  - green;  $|90^\circ-\gamma_i|$  - blue. Open and full symbols refer to phases II and III, respectively. The vertical dashed line indicated the transition between phases II and III.

Phase I  $P6_3/mmc$  295K 0.1MPa\*

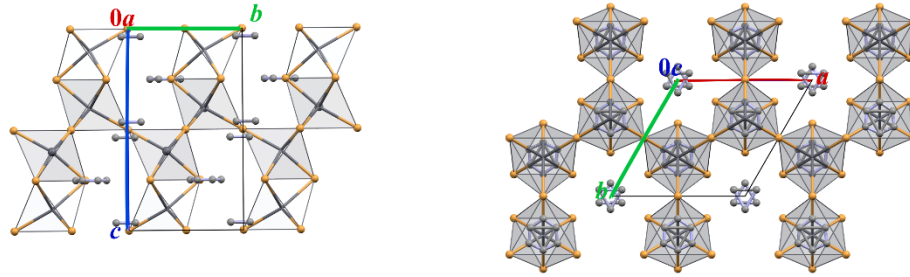

Phase III  $Pna2_1$  190K 0.1MPa\*

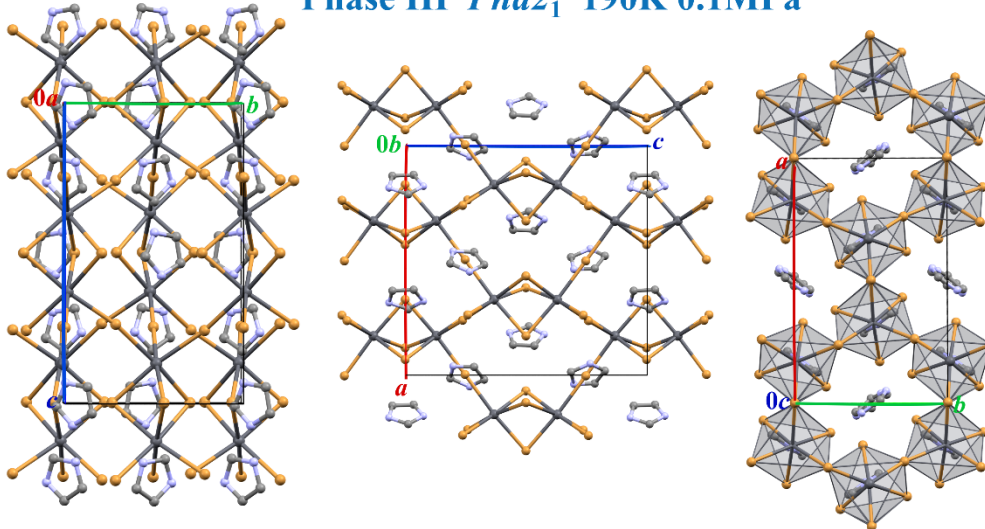

Phase III  $Pna2_1$  297K 0.24GPa

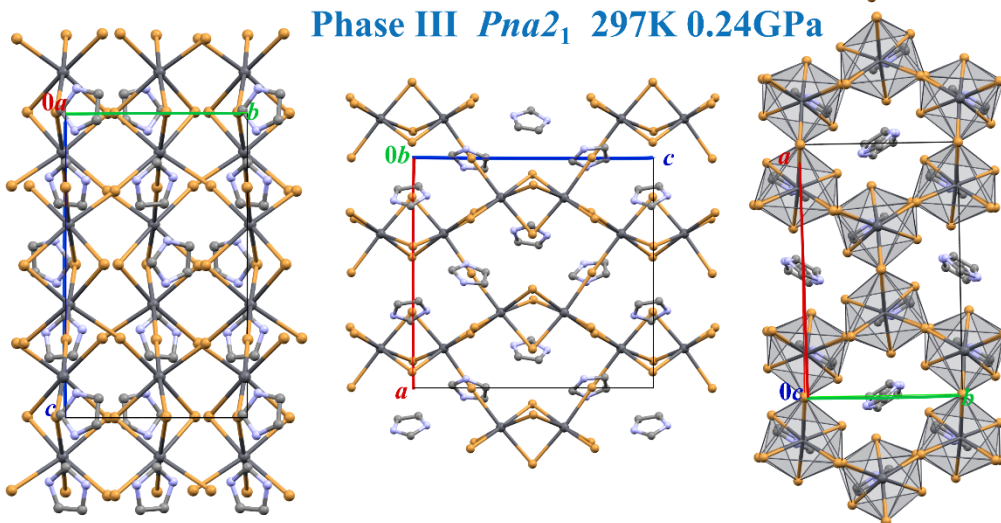

Figure S5.  $IM_3PbBr_5$  in phases I and III along  $a$ ,  $b$ , and  $c$  directions.

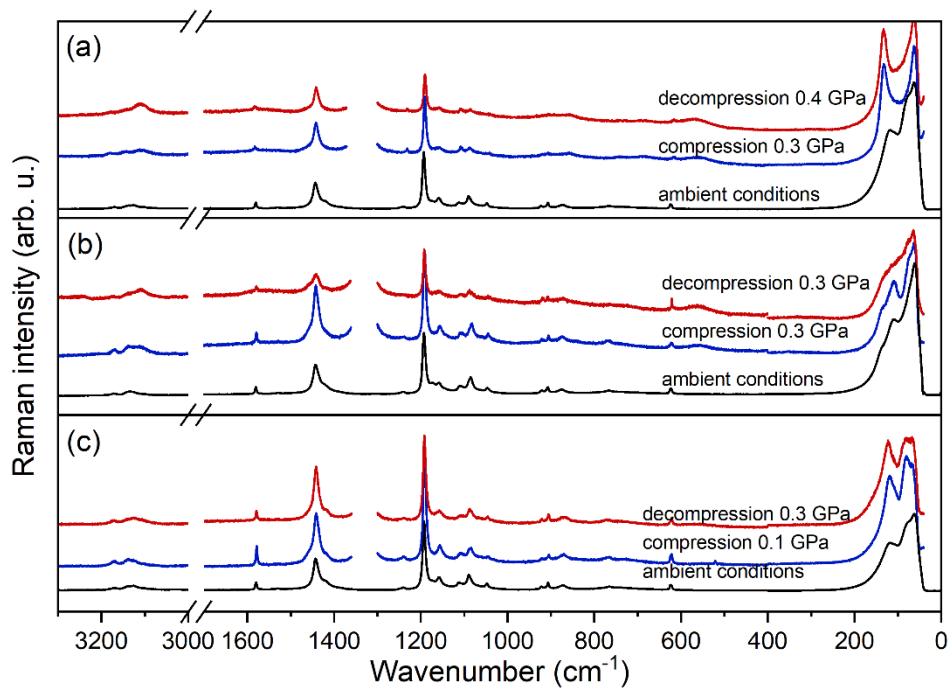

**Figure S6.** Comparison of the Raman spectra at ambient conditions, at the lowest pressure in cell and after decompression for  $\text{IMPbBr}_3$  (a),  $\text{IM}_2\text{PbBr}_4$  (b), and  $\text{IM}_3\text{PbBr}_5$  (c).

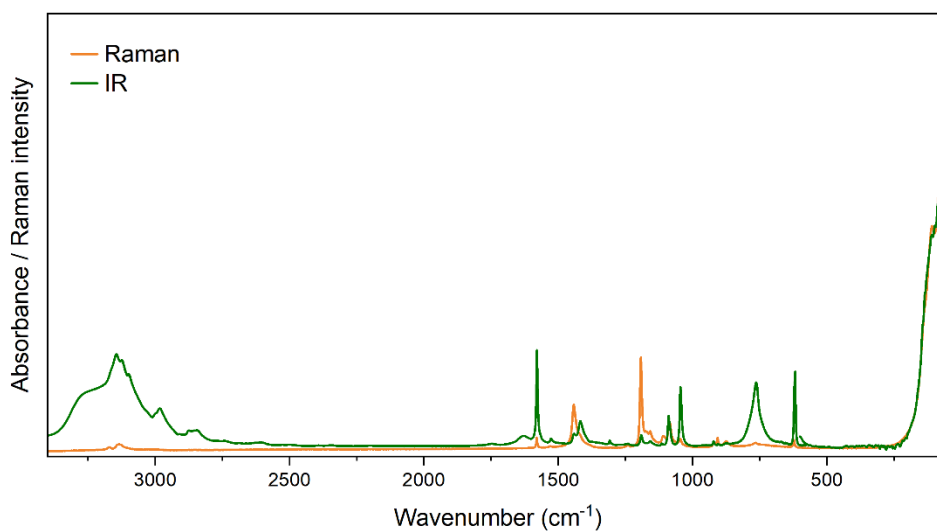

**Figure S7.** Comparison between infrared and Raman spectra at ambient conditions.

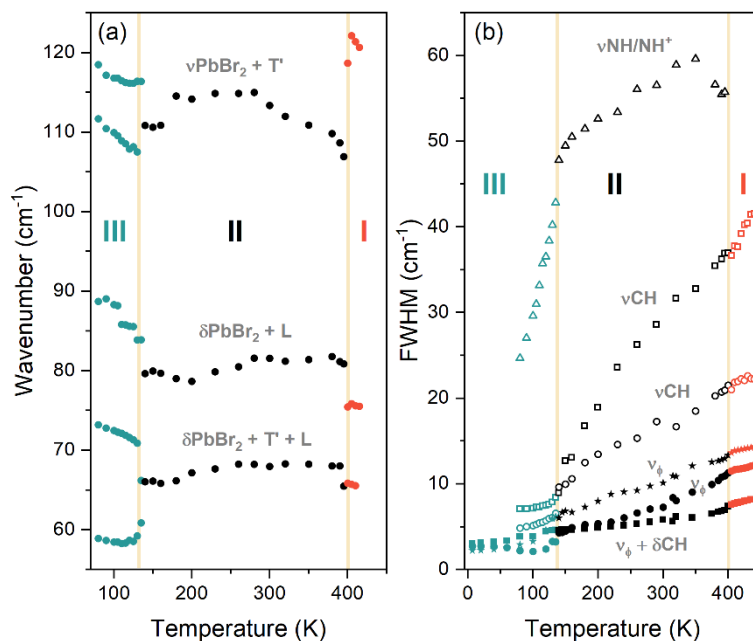

**Figure S8.** Thermal evolution of positions of low-wavenumber Raman bands (a) and changes of the full width at half maximum (FWHM) for selected IR (full symbols) and Raman bands (open symbols) (b) for  $\text{IM}_3\text{PbBr}_5$ ; Peak-fitting uncertainties are within the symbol size.

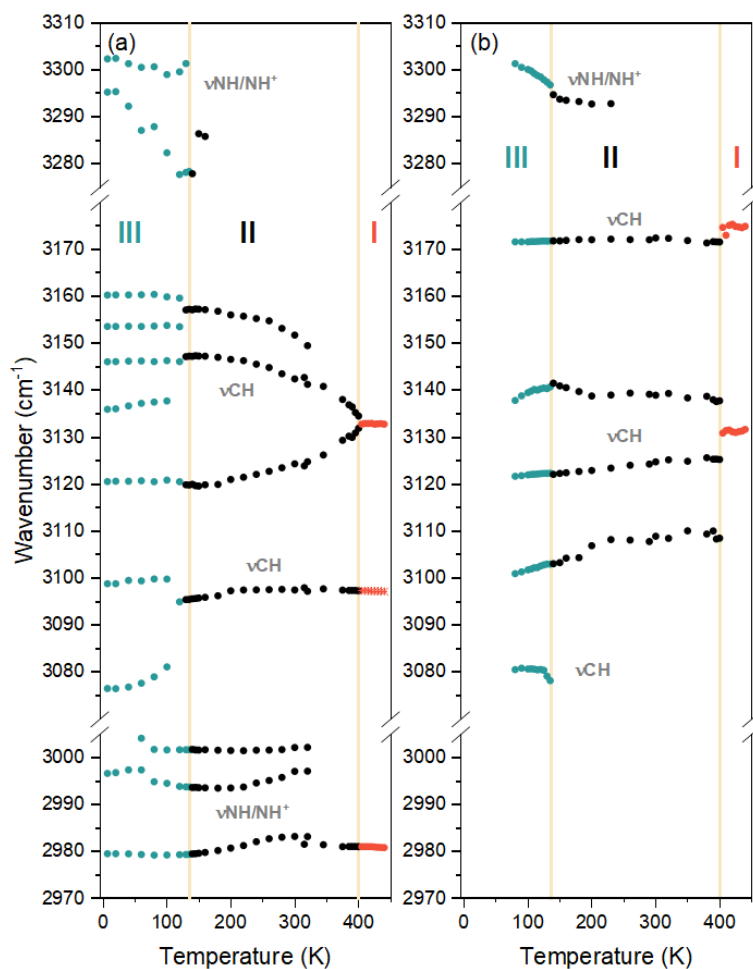

**Figure S9.** Thermal evolution of IR (a) and Raman (b) bands positions in the  $2970\text{--}3310\text{ cm}^{-1}$  range for  $\text{IM}_3\text{PbBr}_5$ ; Peak-fitting uncertainties are within the symbol size.

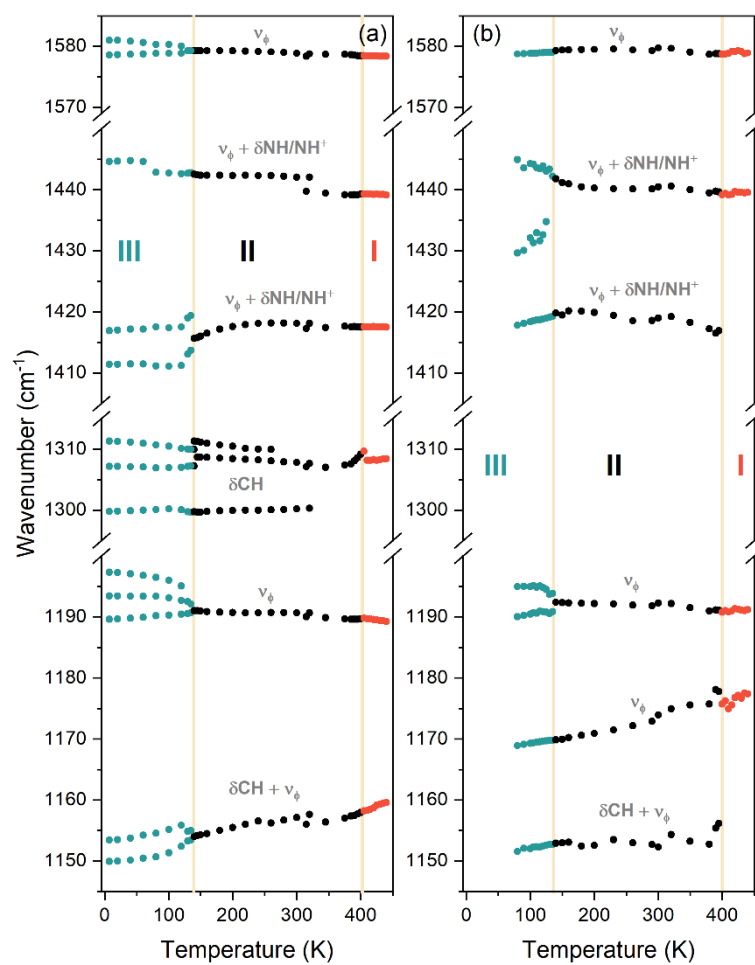

**Figure S10.** Thermal evolution of IR (a) and Raman (b) bands positions in the 1145-1585  $\text{cm}^{-1}$  range for  $\text{IM}_3\text{PbBr}_5$ ; Peak-fitting uncertainties are within the symbol size.

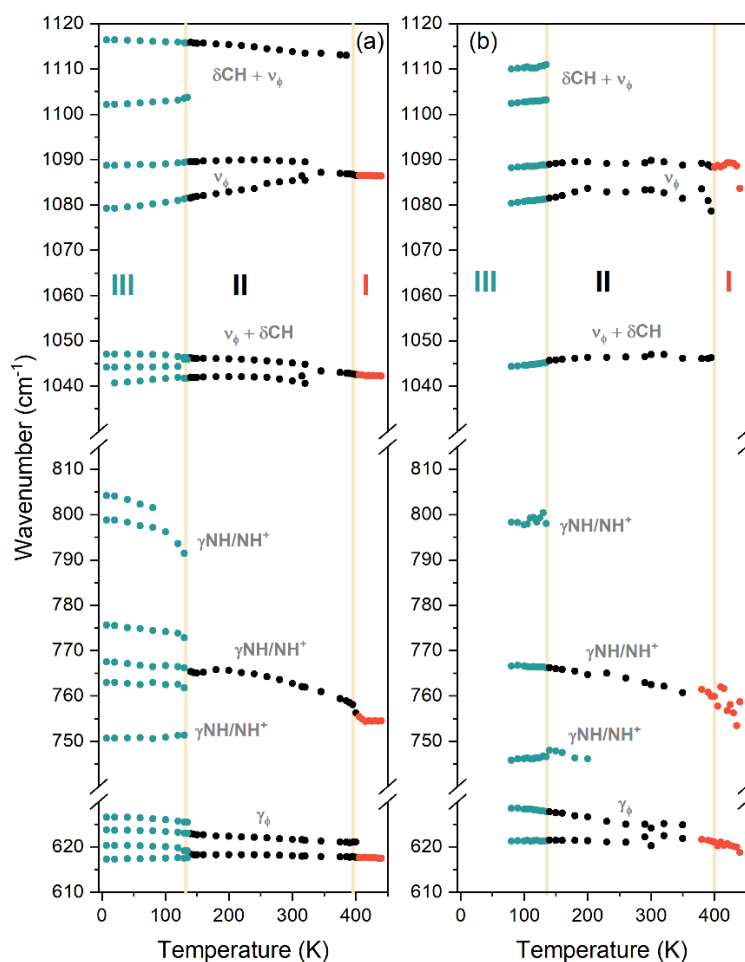

**Figure S11.** Thermal evolution of IR (a) and Raman (b) bands positions in the 610-1120  $\text{cm}^{-1}$  range for  $\text{IM}_3\text{PbBr}_5$ ; Peak-fitting uncertainties are within the symbol size.

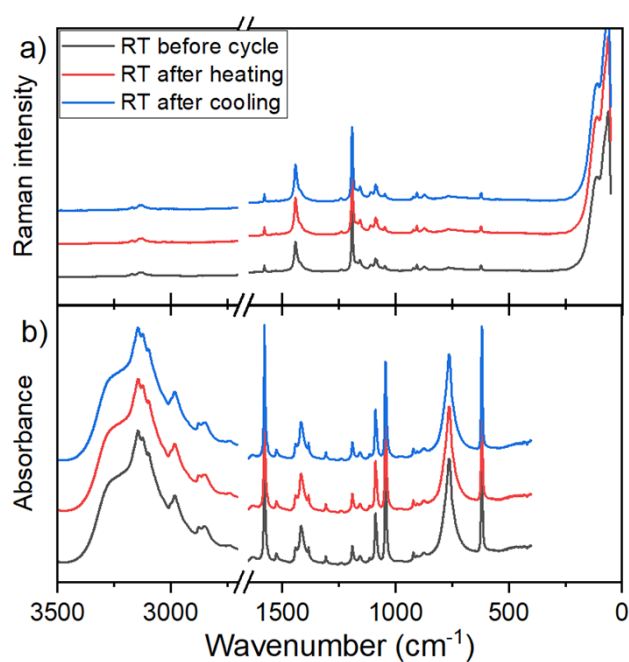

**Figure S12.** Room-temperature Raman (a) and IR spectra (b) of  $\text{IM}_3\text{PbBr}_5$  recorded before and after a thermal-cycling protocol: RT (black lines)  $\rightarrow$  440 K  $\rightarrow$  RT (red lines)  $\rightarrow$  80 K  $\rightarrow$  RT (blue lines). The samples were equilibrated for 30 min at each temperature step.

**Table S1.** Detailed crystallographic data for IMPbBr<sub>3</sub> at high-pressure.

| Pressure                                                                           |              | 0.24 GPa                                                    | 0.63 GPa                                                    | 0.88 GPa                                                    | 1.24 GPa                                                    | 1.65 GPa                                                    | 2.00 GPa                                                    |
|------------------------------------------------------------------------------------|--------------|-------------------------------------------------------------|-------------------------------------------------------------|-------------------------------------------------------------|-------------------------------------------------------------|-------------------------------------------------------------|-------------------------------------------------------------|
| CCDC numbers                                                                       |              | 2473957                                                     | 2473958                                                     | 2473959                                                     | 2473960                                                     | 2473961                                                     | 2473962                                                     |
| Crystal system                                                                     |              | orthorhombic                                                | orthorhombic                                                | orthorhombic                                                | orthorhombic                                                | orthorhombic                                                | orthorhombic                                                |
| Space group                                                                        |              | <i>Pna2</i> <sub>1</sub>                                    |
| Unit cell dimensions                                                               | <i>a</i> (Å) | 14.1683(9)                                                  | 13.9667(7)                                                  | 13.8183(7)                                                  | 13.6717(6)                                                  | 13.5158(6)                                                  | 13.4525(7)                                                  |
|                                                                                    | <i>b</i> (Å) | 8.852(11)                                                   | 8.759(8)                                                    | 8.712(6)                                                    | 8.661(4)                                                    | 8.588(3)                                                    | 8.549(4)                                                    |
|                                                                                    | <i>c</i> (Å) | 14.8432(9)                                                  | 14.8128(7)                                                  | 14.7579(7)                                                  | 14.7132(5)                                                  | 14.6421(5)                                                  | 14.6220(6)                                                  |
| Unit cell angles                                                                   | $\alpha$ (°) | 90                                                          | 90                                                          | 90                                                          | 90                                                          | 90                                                          | 90                                                          |
|                                                                                    | $\beta$ (°)  | 90                                                          | 90                                                          | 90                                                          | 90                                                          | 90                                                          | 90                                                          |
|                                                                                    | $\gamma$ (°) | 90                                                          | 90                                                          | 90                                                          | 90                                                          | 90                                                          | 90                                                          |
| Volume (Å <sup>3</sup> )                                                           |              | 1862(2)                                                     | 1812.2(16)                                                  | 1776.6(11)                                                  | 1742.1(8)                                                   | 1699.5(7)                                                   | 1681.6(7)                                                   |
| Z/Z'                                                                               |              | 8/2                                                         | 8/2                                                         | 8/2                                                         | 8/2                                                         | 8/2                                                         | 8/2                                                         |
| Molecular volume (V/Z)                                                             |              | 232.75                                                      | 226.525                                                     | 222.075                                                     | 217.763                                                     | 212.438                                                     | 210.2                                                       |
| Calculated density (g/cm <sup>3</sup> )                                            |              | 3.682                                                       | 3.783                                                       | 3.858                                                       | 3.935                                                       | 4.033                                                       | 4.076                                                       |
| Absorption (mm <sup>-1</sup> )                                                     |              | 30.932                                                      | 31.774                                                      | 32.411                                                      | 33.053                                                      | 33.882                                                      | 34.242                                                      |
| F(000)                                                                             |              | 1792                                                        | 1792                                                        | 1792                                                        | 1792                                                        | 1792                                                        | 1792                                                        |
| Crystal size (mm)                                                                  |              | 0.20 × 0.20 × 0.04                                          | 0.20 × 0.20 × 0.04                                          | 0.20 × 0.20 × 0.04                                          | 0.20 × 0.20 × 0.04                                          | 0.30 × 0.20 × 0.04                                          | 0.20 × 0.20 × 0.04                                          |
| $\theta$ -range for data collection (°)                                            |              | 4.8670 to 23.6650                                           | 4.6180 to 25.6200                                           | 4.6460 to 25.0130                                           | 4.6750 to 25.7300                                           | 4.7070 to 25.2380                                           | 4.7280 to 25.3250                                           |
| Min/max indices: <i>h, k, l</i>                                                    |              | -17 ≤ <i>h</i> ≤ 17, -2 ≤ <i>k</i> ≤ 2, -18 ≤ <i>l</i> ≤ 18 | -17 ≤ <i>h</i> ≤ 17, -2 ≤ <i>k</i> ≤ 2, -18 ≤ <i>l</i> ≤ 18 | -17 ≤ <i>h</i> ≤ 17, -3 ≤ <i>k</i> ≤ 3, -18 ≤ <i>l</i> ≤ 18 | -16 ≤ <i>h</i> ≤ 17, -3 ≤ <i>k</i> ≤ 3, -18 ≤ <i>l</i> ≤ 18 | -16 ≤ <i>h</i> ≤ 16, -3 ≤ <i>k</i> ≤ 3, -18 ≤ <i>l</i> ≤ 18 | -16 ≤ <i>h</i> ≤ 16, -4 ≤ <i>k</i> ≤ 4, -18 ≤ <i>l</i> ≤ 18 |
| Reflect. Collected/unique                                                          |              | 7698/1022                                                   | 7811/1090                                                   | 7528/1224                                                   | 7227/1226                                                   | 6662/1160                                                   | 7258/1230                                                   |
| Data/restraints/parameters                                                         |              | 1022/178/155                                                | 1090/165/148                                                | 1224/165/148                                                | 1226/171/148                                                | 1160/194/148                                                | 1230/165/148                                                |
| Goodness-of-fit on F <sup>2</sup>                                                  |              | 1.104                                                       | 0.995                                                       | 1.026                                                       | 0.996                                                       | 0.925                                                       | 1.035                                                       |
| Final <i>R</i> <sub>1</sub> / <i>wR</i> <sub>2</sub> ( <i>l</i> >2σ <sub>1</sub> ) |              | 0.0655/0.1641                                               | 0.0467/0.0947                                               | 0.0405/0.0652                                               | 0.0415/0.0630                                               | 0.0404/0.0504                                               | 0.0389/0.0615                                               |
| <i>R</i> <sub>1</sub> / <i>wR</i> <sub>2</sub> (all data)                          |              | 0.1016/0.1933                                               | 0.1147/0.1397                                               | 0.0754/0.0767                                               | 0.0824/0.0757                                               | 0.0836/0.0615                                               | 0.0753/0.0715                                               |
| Largest diff. peak/hole (e.Å <sup>-3</sup> )                                       |              | 1.00/-0.60                                                  | 1.01/-0.99                                                  | 0.79/-0.63                                                  | 1.23/-0.90                                                  | 0.85/-0.67                                                  | 1.01/-0.76                                                  |

$$w=1/(\sigma^2F_o^2+w_1^2*P^2+w_2*P), \text{ where } P=(\text{Max}(F_o^2,0)+2*F_c^2)$$

**Table S2.** Detailed crystallographic data for IMPbBr<sub>3</sub> at high-pressure.

| Pressure                                                                            |              | 2.35 GPa                                                    | 2.65 GPa                                                    | 3.06 GPa                                                    | 3.58 GPa                                                    | 4.29 GPa                                                    | 4.88 GPa                 |
|-------------------------------------------------------------------------------------|--------------|-------------------------------------------------------------|-------------------------------------------------------------|-------------------------------------------------------------|-------------------------------------------------------------|-------------------------------------------------------------|--------------------------|
| CCDC numbers                                                                        |              | 2473963                                                     | 2473964                                                     | 2473965                                                     | 2473966                                                     | 2473967                                                     |                          |
| Crystal system                                                                      |              | orthorhombic                                                | orthorhombic                                                | orthorhombic                                                | orthorhombic                                                | orthorhombic                                                | orthorhombic             |
| Space group                                                                         |              | <i>Pna2</i> <sub>1</sub>                                    | <i>Pna2</i> <sub>1</sub> |
| Unit cell dimensions                                                                | <i>a</i> (Å) | 13.3713(10)                                                 | 13.2728(8)                                                  | 13.2201(7)                                                  | 13.1813(17)                                                 | 13.086(5)                                                   | 12.83(9)                 |
|                                                                                     | <i>b</i> (Å) | 8.508(4)                                                    | 8.449(4)                                                    | 8.379(3)                                                    | 8.300(8)                                                    | 8.2602(4)                                                   | 8.30(1)                  |
|                                                                                     | <i>c</i> (Å) | 14.5938(8)                                                  | 14.5088(6)                                                  | 14.4383(6)                                                  | 14.3792(14)                                                 | 14.2630(5)                                                  | 14.22(1)                 |
| Unit cell angles                                                                    | $\alpha$ (°) | 90                                                          | 90                                                          | 90                                                          | 90                                                          | 90                                                          | 90                       |
|                                                                                     | $\beta$ (°)  | 90                                                          | 90                                                          | 90                                                          | 90                                                          | 90                                                          | 90                       |
|                                                                                     | $\gamma$ (°) | 90                                                          | 90                                                          | 90                                                          | 90                                                          | 90                                                          | 90                       |
| Volume (Å <sup>3</sup> )                                                            |              | 1660.3(8)                                                   | 1627.1(7)                                                   | 1599.3(6)                                                   | 1573.2(16)                                                  | 1541.7(6)                                                   | 1514(11)                 |
| Z/Z'                                                                                |              | 8/2                                                         | 8/2                                                         | 8/2                                                         | 8/2                                                         | 8/2                                                         |                          |
| Molecular volume (V/Z)                                                              |              | 207.538                                                     | 203.388                                                     | 199.913                                                     | 196.65                                                      | 192.713                                                     |                          |
| Calculated density (g/cm <sup>3</sup> )                                             |              | 4.129                                                       | 4.213                                                       | 4.286                                                       | 4.357                                                       | 4.446                                                       |                          |
| Absorption (mm <sup>-1</sup> )                                                      |              | 34.682                                                      | 35.390                                                      | 36.003                                                      | 36.603                                                      | 37.349                                                      |                          |
| F(000)                                                                              |              | 1792                                                        | 1792                                                        | 1792                                                        | 1792                                                        | 1792                                                        |                          |
| Crystal size (mm)                                                                   |              | 0.20 × 0.20 × 0.04                                          | 0.20 × 0.20 × 0.04                                          | 0.20 × 0.20 × 0.04                                          | 0.20 × 0.20 × 0.04                                          | 0.30 × 0.20 × 0.04                                          |                          |
| $\theta$ -range for data collection (°)                                             |              | 4.7480 to 25.3930                                           | 4.7820 to 25.5460                                           | 4.1640 to 25.6090                                           | 4.8000 to 26.0870                                           | 4.9240 to 25.6350                                           |                          |
| Min/max indices: <i>h, k, l</i>                                                     |              | -16 ≤ <i>h</i> ≤ 16, -4 ≤ <i>k</i> ≤ 4, -18 ≤ <i>l</i> ≤ 18 | -16 ≤ <i>h</i> ≤ 16, -4 ≤ <i>k</i> ≤ 4, -18 ≤ <i>l</i> ≤ 18 | -16 ≤ <i>h</i> ≤ 16, -4 ≤ <i>k</i> ≤ 4, -18 ≤ <i>l</i> ≤ 18 | -16 ≤ <i>h</i> ≤ 16, -3 ≤ <i>k</i> ≤ 3, -18 ≤ <i>l</i> ≤ 18 | -5 ≤ <i>h</i> ≤ 5, -10 ≤ <i>k</i> ≤ 10, -18 ≤ <i>l</i> ≤ 17 |                          |
| Reflect. Collected/unique                                                           |              | 7285/1022                                                   | 7077/1227                                                   | 7182/1220                                                   | 5843/1074                                                   | 6861/1139                                                   |                          |
| Data/restraints/parameters                                                          |              | 1239/189/148                                                | 1227/123/148                                                | 1220/118/148                                                | 1074/193/147                                                | 1139/171/148                                                |                          |
| Goodness-of-fit on F <sup>2</sup>                                                   |              | 1.045                                                       | 1.029                                                       | 1.032                                                       | 1.039                                                       | 1.027                                                       |                          |
| Final <i>R</i> <sub>1</sub> / <i>wR</i> <sub>2</sub> ( <i>I</i> > 2σ <sub>1</sub> ) |              | 0.0443/0.0825                                               | 0.0406/0.0677                                               | 0.0412/0.0718                                               | 0.0798/0.1487                                               | 0.0368/0.0576                                               |                          |
| <i>R</i> <sub>1</sub> / <i>wR</i> <sub>2</sub> (all data)                           |              | 0.0826/0.0968                                               | 0.0685/0.0768                                               | 0.0673/0.0797                                               | 0.1503/0.1870                                               | 0.0592/0.0657                                               |                          |
| Largest diff. peak/hole (e.Å <sup>-3</sup> )                                        |              | 1.02/-0.95                                                  | 0.89/-0.91                                                  | 0.79/-0.78                                                  | 1.13/-1.31                                                  | 0.81/-0.90                                                  |                          |

$$w=1/(\sigma^2 F_o^2+w_1^2 * P^2+w_2 * P), \text{ where } P=(\text{Max}(F_o^2,0)+2 * Fc^2)$$

**Table S3.** Detailed crystallographic data for IM<sub>2</sub>PbBr<sub>4</sub> at high-pressure.

| Pressure                                     |              | 0.41 GPa                                                 | 0.65 GPa                                                 | 1.12 GPa                                                 | 1.80 GPa                                                 | 2.22 GPa                                                 |
|----------------------------------------------|--------------|----------------------------------------------------------|----------------------------------------------------------|----------------------------------------------------------|----------------------------------------------------------|----------------------------------------------------------|
| CCDC numbers                                 |              | 2473968                                                  | 2473969                                                  | 2473970                                                  | 2473971                                                  | 2473972                                                  |
| Crystal system                               |              | triclinic                                                | triclinic                                                | triclinic                                                | triclinic                                                | triclinic                                                |
| Space group                                  |              | $P\bar{1}$                                               | $P\bar{1}$                                               | $P\bar{1}$                                               | $P\bar{1}$                                               | $P\bar{1}$                                               |
| Unit cell dimensions                         | $a$ (Å)      | 6.0172(15)                                               | 6.0024(9)                                                | 5.9525(5)                                                | 5.9111(6)                                                | 5.8790(10)                                               |
|                                              | $b$ (Å)      | 9.261(4)                                                 | 9.245(3)                                                 | 9.1849(15)                                               | 9.1347(17)                                               | 9.118(3)                                                 |
|                                              | $c$ (Å)      | 13.551(12)                                               | 13.363(8)                                                | 13.074(5)                                                | 12.854(5)                                                | 12.730(7)                                                |
| Unit cell angles                             | $\alpha$ (°) | 74.19(6)                                                 | 74.11(4)                                                 | 73.89(2)                                                 | 73.64(3)                                                 | 73.36(4)                                                 |
|                                              | $\beta$ (°)  | 86.64(7)                                                 | 85.77(4)                                                 | 85.092(17)                                               | 84.56(2)                                                 | 84.27(3)                                                 |
|                                              | $\gamma$ (°) | 88.31(3)                                                 | 87.953(19)                                               | 87.626(10)                                               | 87.363(13)                                               | 87.12(2)                                                 |
| Volume (Å <sup>3</sup> )                     |              | 725.3(8)                                                 | 711.2(5)                                                 | 684.1(3)                                                 | 662.8(3)                                                 | 650.4(4)                                                 |
| Z/Z'                                         |              | 2/1                                                      | 2/1                                                      | 2/1                                                      | 2/1                                                      | 2/1                                                      |
| Molecular volume (V/Z)                       |              | 362.65                                                   | 355.6                                                    | 342.05                                                   | 331.4                                                    | 325.2                                                    |
| Calculated density (g/cm <sup>3</sup> )      |              | 3.045                                                    | 3.105                                                    | 3.228                                                    | 3.332                                                    | 3.396                                                    |
| Absorption (mm <sup>-1</sup> )               |              | 22.626                                                   | 23.075                                                   | 23.989                                                   | 24.759                                                   | 25.232                                                   |
| F(000)                                       |              | 592                                                      | 592                                                      | 592                                                      | 592                                                      | 592                                                      |
| Crystal size (mm)                            |              | 0.23 × 0.09 × 0.05                                       | 0.23 × 0.10 × 0.06                                       | 0.23 × 0.10 × 0.06                                       | 0.23 × 0.10 × 0.06                                       | 0.23 × 0.10 × 0.06                                       |
| $\theta$ -range for data collection (°)      |              | 2.2040 to 25.1820                                        | 2.2120 to 22.6070                                        | 3.4020 to 23.3450                                        | 3.4010 to 22.7600                                        | 3.4240 to 23.0440                                        |
| Min/max indices: $h, k, l$                   |              | $-6 \leq h \leq 7, -10 \leq k \leq 10, -4 \leq l \leq 5$ | $-7 \leq h \leq 7, -10 \leq k \leq 10, -5 \leq l \leq 5$ | $-8 \leq h \leq 7, -10 \leq k \leq 11, -5 \leq l \leq 5$ | $-8 \leq h \leq 7, -11 \leq k \leq 11, -4 \leq l \leq 4$ | $-7 \leq h \leq 7, -10 \leq k \leq 10, -4 \leq l \leq 4$ |
| Reflect. Collected/unique                    |              | 1344/480                                                 | 3136/613                                                 | 6736/655                                                 | 6104/634                                                 | 6784/566                                                 |
| Data/restraints/parameters                   |              | 480/154/121                                              | 613/152/121                                              | 655/141/120                                              | 634/124/120                                              | 566/147/120                                              |
| Goodness-of-fit on F <sup>2</sup>            |              | 1.003                                                    | 0.995                                                    | 1.063                                                    | 1.035                                                    | 1.007                                                    |
| Final $R_1/wR_2$ ( $l > 2\sigma_1$ )         |              | 0.0808/0.1482                                            | 0.0656/0.1365                                            | 0.0595/0.1067                                            | 0.0575/0.1109                                            | 0.0615/0.1168                                            |
| $R_1/wR_2$ (all data)                        |              | 0.1778/0.1949                                            | 0.1350/0.1657                                            | 0.1367/0.1608                                            | 0.1253/0.1501                                            | 0.1293/0.1543                                            |
| Largest diff. peak/hole (e.Å <sup>-3</sup> ) |              | 0.63/-0.72                                               | 0.82/-0.87                                               | 0.92/-0.71                                               | 0.94/-0.81                                               | 0.89/-0.64                                               |

$$w=1/(\sigma^2 F_o^2 + w_1^2 * P^2 + w_2 * P), \text{ where } P=(\text{Max}(F_o^2, 0) + 2 * Fc^2)$$

**Table S4.** Detailed crystallographic data for IM<sub>2</sub>PbBr<sub>4</sub> at high-pressure.

| Pressure                                     |              | 2.84 GPa                                 | 3.26 GPa                                   | 3.71 GPa                                   | 4.13 GPa                                   | 5.26 GPa                                   |
|----------------------------------------------|--------------|------------------------------------------|--------------------------------------------|--------------------------------------------|--------------------------------------------|--------------------------------------------|
| CCDC numbers                                 |              | 2473973                                  | 2473974                                    | 2473975                                    | 2473976                                    | 2473977                                    |
| Crystal system                               |              | triclinic                                | triclinic                                  | triclinic                                  | triclinic                                  | triclinic                                  |
| Space group                                  |              | $P\bar{1}$                               | $P\bar{1}$                                 | $P\bar{1}$                                 | $P\bar{1}$                                 | $P\bar{1}$                                 |
| Unit cell dimensions                         | $a$ (Å)      | 5.8316(13)                               | 5.808(4)                                   | 5.7758(5)                                  | 5.749(4)                                   | 5.732(4)                                   |
|                                              | $b$ (Å)      | 9.108(3)                                 | 9.096(6)                                   | 9.0820(16)                                 | 9.075(7)                                   | 9.062(8)                                   |
|                                              | $c$ (Å)      | 12.603(8)                                | 12.435(15)                                 | 12.395(6)                                  | 12.356(16)                                 | 12.225(19)                                 |
| Unit cell angles                             | $\alpha$ (°) | 72.46(5)                                 | 72.49(10)                                  | 71.96(3)                                   | 71.40(12)                                  | 71.26(13)                                  |
|                                              | $\beta$ (°)  | 83.89(5)                                 | 83.38(10)                                  | 82.46(2)                                   | 81.78(12)                                  | 81.11(13)                                  |
|                                              | $\gamma$ (°) | 86.50(2)                                 | 86.07(5)                                   | 85.392(10)                                 | 85.02(6)                                   | 84.70(7)                                   |
| Volume (Å <sup>3</sup> )                     |              | 634.3(5)                                 | 621.9(10)                                  | 612.3(4)                                   | 604.1(11)                                  | 593.5(12)                                  |
| $Z/Z'$                                       |              | 2/1                                      | 2/1                                        | 2/1                                        | 2/1                                        | 2/1                                        |
| Molecular volume (V/Z)                       |              | 317.15                                   | 310.95                                     | 306.15                                     | 302.05                                     | 296.75                                     |
| Calculated density (g/cm <sup>3</sup> )      |              | 3.482                                    | 3.551                                      | 3.607                                      | 3.656                                      | 3.721                                      |
| Absorption (mm <sup>-1</sup> )               |              | 25.870                                   | 26.387                                     | 26.801                                     | 27.165                                     | 27.653                                     |
| F(000)                                       |              | 592                                      | 592                                        | 592                                        | 592                                        | 592                                        |
| Crystal size (mm)                            |              | 0.23 × 0.10 × 0.06                       | 0.23 × 0.10 × 0.06                         | 0.23 × 0.10 × 0.06                         | 0.23 × 0.10 × 0.06                         | 0.23 × 0.10 × 0.06                         |
| $\theta$ -range for data collection (°)      |              | 3.4440 to 18.8000                        | 3.4030 to 17.1220                          | 3.5380 to 24.3890                          | 3.4760 to 23.2970                          | 3.5020 to 23.3330                          |
| Min/max indices: $h, k, l$                   |              | -6 ≤ $h$ ≤ 6, -9 ≤ $k$ ≤ 9, -4 ≤ $l$ ≤ 4 | -7 ≤ $h$ ≤ 7, -10 ≤ $k$ ≤ 10, -3 ≤ $l$ ≤ 3 | -6 ≤ $h$ ≤ 7, -10 ≤ $k$ ≤ 11, -3 ≤ $l$ ≤ 3 | -7 ≤ $h$ ≤ 7, -11 ≤ $k$ ≤ 11, -4 ≤ $l$ ≤ 4 | -7 ≤ $h$ ≤ 7, -11 ≤ $k$ ≤ 11, -4 ≤ $l$ ≤ 4 |
| Reflect. Collected/unique                    |              | 4017/424                                 | 4438/540                                   | 2353/428                                   | 2353/517                                   | 5514/537                                   |
| Data/restraints/parameters                   |              | 424/181/120                              | 540/185/120                                | 428/200/120                                | 517/267/120                                | 537/211/120                                |
| Goodness-of-fit on $F^2$                     |              | 1.063                                    | 1.010                                      | 1.111                                      | 1.023                                      | 0.979                                      |
| Final $R_1/wR_2$ ( $l > 2\sigma_1$ )         |              | 0.0748/0.1215                            | 0.0640/0.1199                              | 0.0482/0.1023                              | 0.0778/0.1573                              | 0.0732/0.1562                              |
| $R_1/wR_2$ (all data)                        |              | 0.1811/0.2142                            | 0.1649/0.1616                              | 0.0695/0.1116                              | 0.1795/0.1981                              | 0.1508/0.1948                              |
| Largest diff. peak/hole (e.Å <sup>-3</sup> ) |              | 1.56/-0.90                               | 0.85/-0.69                                 | 0.67/-0.60                                 | 0.80/-0.61                                 | 0.97/-0.65                                 |

$$w=1/(\sigma^2 F_o^2+w_1^2 * P^2+w_2 * P), \text{ where } P=(\text{Max}(F_o^2,0)+2 * Fc^2)$$

**Table S5.** Detailed crystallographic data for IM<sub>3</sub>PbBr<sub>5</sub> at high-pressure.

| Pressure                                                                       |              | <b>0.33 Pa</b>                                            | <b>0.60 GPa</b>                                           | <b>1.07 GPa</b>                                           | <b>1.55 GPa</b>                                           | <b>2.04 GPa</b>                                           |
|--------------------------------------------------------------------------------|--------------|-----------------------------------------------------------|-----------------------------------------------------------|-----------------------------------------------------------|-----------------------------------------------------------|-----------------------------------------------------------|
| CCDC numbers                                                                   |              | 2473978                                                   | 2473979                                                   | 2473980                                                   | 2473981                                                   | 2473982                                                   |
| Crystal system                                                                 |              | triclinic                                                 | triclinic                                                 | triclinic                                                 | triclinic                                                 | triclinic                                                 |
| Space group                                                                    |              | <i>P</i> 1                                                |
| Unit cell dimensions                                                           | <i>a</i> (Å) | 6.0296(6)                                                 | 6.0080(7)                                                 | 5.9703(6)                                                 | 5.9377(5)                                                 | 5.9165(5)                                                 |
|                                                                                | <i>b</i> (Å) | 9.308(2)                                                  | 9.260(2)                                                  | 9.196(3)                                                  | 9.139(2)                                                  | 9.1040(18)                                                |
|                                                                                | <i>c</i> (Å) | 9.546(4)                                                  | 9.437(4)                                                  | 9.275(4)                                                  | 9.150(3)                                                  | 9.066(3)                                                  |
| Unit cell angles                                                               | $\alpha$ (°) | 66.89(3)                                                  | 66.76(3)                                                  | 66.43(3)                                                  | 66.16(3)                                                  | 65.96(3)                                                  |
|                                                                                | $\beta$ (°)  | 85.91(2)                                                  | 85.41(2)                                                  | 84.81(2)                                                  | 84.388(17)                                                | 84.090(16)                                                |
|                                                                                | $\gamma$ (°) | 88.10(2)                                                  | 87.83(2)                                                  | 87.456(17)                                                | 87.214(15)                                                | 86.978(14)                                                |
| Volume (Å <sup>3</sup> )                                                       |              | 491.4(2)                                                  | 480.9(3)                                                  | 464.8(3)                                                  | 452.0(2)                                                  | 443.6(2)                                                  |
| <i>Z</i> / <i>Z'</i>                                                           |              | 1/1                                                       | 1/1                                                       | 1/1                                                       | 1/1                                                       | 1/1                                                       |
| Molecular volume (V/ <i>Z</i> )                                                |              | 491.4                                                     | 480.9                                                     | 464.8                                                     | 452.0                                                     | 443.6                                                     |
| Calculated density (g/cm <sup>3</sup> )                                        |              | 2.750                                                     | 2.811                                                     | 2.908                                                     | 2.991                                                     | 3.047                                                     |
| Absorption (mm <sup>-1</sup> )                                                 |              | 18.747                                                    | 19.160                                                    | 19.822                                                    | 20.383                                                    | 20.771                                                    |
| F(000)                                                                         |              | 368                                                       | 368                                                       | 368                                                       | 368                                                       | 368                                                       |
| Crystal size (mm)                                                              |              | 0.25 × 0.15 × 0.05                                        | 0.25 × 0.15 × 0.05                                        | 0.25 × 0.15 × 0.05                                        | 0.25 × 0.20 × 0.05                                        | 0.25 × 0.15 × 0.05                                        |
| $\theta$ -range for data collection (°)                                        |              | 5.1710 to 24.2380                                         | 5.2200 to 24.6900                                         | 5.2740 to 25.1390                                         | 5.3270 to 25.2100                                         | 4.5770 to 25.2810                                         |
| Min/max indices: <i>h</i> , <i>k</i> , <i>l</i>                                |              | -7 ≤ <i>h</i> ≤ 7, -11 ≤ <i>k</i> ≤ 11, -6 ≤ <i>l</i> ≤ 6 | -7 ≤ <i>h</i> ≤ 7, -11 ≤ <i>k</i> ≤ 11, -6 ≤ <i>l</i> ≤ 6 | -7 ≤ <i>h</i> ≤ 7, -11 ≤ <i>k</i> ≤ 11, -6 ≤ <i>l</i> ≤ 6 | -7 ≤ <i>h</i> ≤ 7, -11 ≤ <i>k</i> ≤ 11, -7 ≤ <i>l</i> ≤ 7 | -7 ≤ <i>h</i> ≤ 7, -11 ≤ <i>k</i> ≤ 11, -6 ≤ <i>l</i> ≤ 6 |
| Reflect. Collected/unique                                                      |              | 2413/850                                                  | 2469/866                                                  | 2303/817                                                  | 2645/1030                                                 | 2214/785                                                  |
| Data/restraints/parameters                                                     |              | 850/238/166                                               | 866/237/167                                               | 817/249/166                                               | 1030/264/167                                              | 785/225/165                                               |
| Goodness-of-fit on <i>F</i> <sup>2</sup>                                       |              | 1.032                                                     | 1.036                                                     | 1.077                                                     | 1.045                                                     | 1.045                                                     |
| Final <i>R</i> <sub>1</sub> / <i>wR</i> <sub>2</sub> ( <i>l</i> >2 $\sigma$ 1) |              | 0.0396/0.0790                                             | 0.0441/0.0948                                             | 0.0542/0.1287                                             | 0.0879/0.2244                                             | 0.0369/0.0760                                             |
| <i>R</i> <sub>1</sub> / <i>wR</i> <sub>2</sub> (all data)                      |              | 0.0563/0.0848                                             | 0.0667/0.1030                                             | 0.0694/0.1398                                             | 0.1100/0.2536                                             | 0.0509/0.0811                                             |
| Largest diff. peak/hole (e.Å <sup>-3</sup> )                                   |              | 0.41/-0.35                                                | 0.43/-0.38                                                | 0.55/-0.61                                                | 1.17/-0.83                                                | 0.38/-0.36                                                |

$$w=1/(\sigma^2 F_o^2 + w_1^2 * P^2 + w_2 * P), \text{ where } P=(\text{Max}(F_o^2, 0) + 2 * Fc^2)$$

**Table S6.** Detailed crystallographic data for IM<sub>3</sub>PbBr<sub>5</sub> at high-pressure

| Pressure                                                                       |              | 2.43 Pa                                                   | 2.97 GPa                                                  | 3.45 GPa                                                  | 3.92 GPa                                                  | 4.35 GPa                                                  |
|--------------------------------------------------------------------------------|--------------|-----------------------------------------------------------|-----------------------------------------------------------|-----------------------------------------------------------|-----------------------------------------------------------|-----------------------------------------------------------|
| CCDC numbers                                                                   |              | 2473983                                                   | 2473984                                                   | 2473985                                                   | 2473986                                                   | 2473987                                                   |
| Crystal system                                                                 |              | triclinic                                                 | triclinic                                                 | triclinic                                                 | triclinic                                                 | triclinic                                                 |
| Space group                                                                    |              | <i>P</i> 1                                                |
| Unit cell dimensions                                                           | <i>a</i> (Å) | 5.8912(5)                                                 | 5.8382(4)                                                 | 5.8206(4)                                                 | 5.8103(6)                                                 | 5.8034(10)                                                |
|                                                                                | <i>b</i> (Å) | 9.0889(19)                                                | 9.0575(19)                                                | 9.0421(18)                                                | 9.030(2)                                                  | 9.018(4)                                                  |
|                                                                                | <i>c</i> (Å) | 8.999(3)                                                  | 8.999(3)                                                  | 8.859(3)                                                  | 8.837(3)                                                  | 8.829(6)                                                  |
| Unit cell angles                                                               | $\alpha$ (°) | 65.73(3)                                                  | 65.44(3)                                                  | 65.34(2)                                                  | 65.33(3)                                                  | 65.20(5)                                                  |
|                                                                                | $\beta$ (°)  | 83.808(16)                                                | 83.329(15)                                                | 83.175(14)                                                | 83.145(19)                                                | 82.86(3)                                                  |
|                                                                                | $\gamma$ (°) | 86.707(14)                                                | 86.199(13)                                                | 86.025(12)                                                | 85.946(17)                                                | 85.75(3)                                                  |
| Volume (Å <sup>3</sup> )                                                       |              | 436.6(2)                                                  | 429.8(2)                                                  | 420.62(17)                                                | 418.21(19)                                                | 416.1(4)                                                  |
| <i>Z</i> / <i>Z'</i>                                                           |              | 1/1                                                       | 1/1                                                       | 1/1                                                       | 1/1                                                       | 1/1                                                       |
| Molecular volume (V/ <i>Z</i> )                                                |              | 436.6                                                     | 429.8                                                     | 420.62                                                    | 418.21                                                    | 416.1                                                     |
| Calculated density (g/cm <sup>3</sup> )                                        |              | 3.096                                                     | 3.145                                                     | 3.214                                                     | 3.232                                                     | 3.249                                                     |
| Absorption (mm <sup>-1</sup> )                                                 |              | 21.100                                                    | 21.437                                                    | 21.904                                                    | 22.030                                                    | 22.142                                                    |
| F(000)                                                                         |              | 368                                                       | 368                                                       | 368                                                       | 368                                                       | 368                                                       |
| Crystal size (mm)                                                              |              | 0.25 × 0.15 × 0.05                                        | 0.25 × 0.15 × 0.05                                        | 0.25 × 0.15 × 0.05                                        | 0.25 × 0.15 × 0.05                                        | 0.25 × 0.20 × 0.05                                        |
| $\theta$ -range for data collection (°)                                        |              | 4.6120 to 25.3030                                         | 4.6820 to 25.5930                                         | 5.4310 to 25.6550                                         | 4.3570 to 25.3680                                         | 4.3850 to 23.7140                                         |
| Min/max indices: <i>h</i> , <i>k</i> , <i>l</i>                                |              | -7 ≤ <i>h</i> ≤ 7, -11 ≤ <i>k</i> ≤ 11, -6 ≤ <i>l</i> ≤ 6 | -7 ≤ <i>h</i> ≤ 7, -11 ≤ <i>k</i> ≤ 11, -6 ≤ <i>l</i> ≤ 6 | -7 ≤ <i>h</i> ≤ 7, -11 ≤ <i>k</i> ≤ 11, -6 ≤ <i>l</i> ≤ 6 | -7 ≤ <i>h</i> ≤ 7, -11 ≤ <i>k</i> ≤ 11, -6 ≤ <i>l</i> ≤ 6 | -7 ≤ <i>h</i> ≤ 7, -11 ≤ <i>k</i> ≤ 11, -6 ≤ <i>l</i> ≤ 6 |
| Reflect. Collected/unique                                                      |              | 2206/777                                                  | 2167/759                                                  | 2147/752                                                  | 2091/737                                                  | 1983/716                                                  |
| Data/restraints/parameters                                                     |              | 777/247/167                                               | 759/245/167                                               | 752/245/167                                               | 737/245/166                                               | 716/252/166                                               |
| Goodness-of-fit on F <sup>2</sup>                                              |              | 1.132                                                     | 1.049                                                     | 1.064                                                     | 1.024                                                     | 1.052                                                     |
| Final <i>R</i> <sub>1</sub> / <i>wR</i> <sub>2</sub> ( <i>l</i> >2 $\sigma$ 1) |              | 0.0438/0.0954                                             | 0.0393/0.0916                                             | 0.0364/0.0778                                             | 0.0389/0.0776                                             | 0.0728/0.1698                                             |
| <i>R</i> <sub>1</sub> / <i>wR</i> <sub>2</sub> (all data)                      |              | 0.0549/0.0995                                             | 0.0449/0.0944                                             | 0.0410/0.0795                                             | 0.0458/0.0805                                             | 0.0917/0.1830                                             |
| Largest diff. peak/hole (e.Å <sup>-3</sup> )                                   |              | 0.46/-0.40                                                | 0.69/-0.38                                                | 0.46/-0.38                                                | 0.46/-0.40                                                | 1.24/-0.85                                                |

$$w=1/(\sigma^2 F_o^2 + w_1^2 * P^2 + w_2 * P), \text{ where } P=(\text{Max}(F_o^2, 0) + 2 * Fc^2)$$

**Table S7.** Linear fitting results of pressure-dependencies of Raman bands of IMPbBr<sub>3</sub>.

| III                               |                                                       | IV                                |                                                       | Assignment                                               |
|-----------------------------------|-------------------------------------------------------|-----------------------------------|-------------------------------------------------------|----------------------------------------------------------|
| $\omega_0$<br>(cm <sup>-1</sup> ) | $d\omega/dp$<br>(cm <sup>-1</sup> GPa <sup>-1</sup> ) | $\omega_0$<br>(cm <sup>-1</sup> ) | $d\omega/dp$<br>(cm <sup>-1</sup> GPa <sup>-1</sup> ) |                                                          |
| 3350.3                            | -2.95                                                 | 3346.4                            | -6.40                                                 | $\nu_{\text{NH}} + \nu_{\text{NH}^+}$                    |
| 3190.8                            | 4.15                                                  | 3187.5                            | 5.02                                                  | $\nu_{\text{CH}}$                                        |
| 3175.2                            | 5.76                                                  | 3183.5                            | 2.85                                                  |                                                          |
| 3148.8                            | 4.86                                                  | 3148.7                            | 4.78                                                  |                                                          |
| 1440.4                            | 1.25                                                  | 1440.3                            | 2.79                                                  | $\nu_{\phi} + \delta_{\text{NH}} + \delta_{\text{NH}^+}$ |
|                                   |                                                       | 1427.0                            | 2.41                                                  |                                                          |
|                                   |                                                       | 1416.7                            | 0.74                                                  |                                                          |
| 1189.0                            | 1.72                                                  | 1186.0                            | 2.30                                                  | $\nu_{\phi}$                                             |
| 1162.5                            | -0.45                                                 | 1156.5                            | 1.12                                                  | $\delta_{\text{CH}} + \nu_{\phi}$                        |
| 1159.5                            | -0.34                                                 | 1160.4                            | -0.48                                                 |                                                          |
| 1107.8                            | 1.62                                                  | 1094.4                            | 5.42                                                  |                                                          |
| 1042.3                            | 1.33                                                  | 1043.4                            | 0.95                                                  |                                                          |
| 918.0                             | 0.12                                                  | 912.8                             | 0.70                                                  | $\delta_{\phi}$                                          |
| 615.0                             | 0.45                                                  | 609.1                             | 2.06                                                  | $\gamma_{\theta}$                                        |
|                                   |                                                       | 606.5                             | 1.23                                                  |                                                          |
| 139.4                             | 3.69                                                  | 104.6                             | 16.8                                                  | $\nu_{\text{PbBr}}$                                      |
|                                   |                                                       | 83.3                              | 15.9                                                  |                                                          |
|                                   |                                                       | 124.1                             | 6.45                                                  |                                                          |
|                                   |                                                       | 127.6                             | 5.00                                                  |                                                          |
| 95.1                              | 7.46                                                  | 106.3                             | 3.22                                                  | $\nu_{\text{PbBr}}$                                      |
|                                   |                                                       | 93.1                              | 8.74                                                  |                                                          |
| 57.5                              | 2.06                                                  | 60.3                              | 2.53                                                  | $\delta_{\text{PbBr}}$                                   |
|                                   |                                                       | 55.4                              | 2.39                                                  |                                                          |

Key:  $\delta$ , bending (scissoring);  $\delta_{\phi}$ , in-plane ring bending;  $d\omega/dp$ , slope;  $\gamma_{\phi}$ , out-of-plane ring bending,  $\nu$ , stretching;  $\nu_{\phi}$ , ring stretching,  $\omega_0$ , intercept

**Table S8.** Linear fitting results of pressure-dependencies of Raman bands of IM<sub>2</sub>PbBr<sub>4</sub>.

| $\omega_0$<br>(cm <sup>-1</sup> ) | II                                                    |                                   | III                                                   |                                   | IV                                                    |                                         | Assignment |       |
|-----------------------------------|-------------------------------------------------------|-----------------------------------|-------------------------------------------------------|-----------------------------------|-------------------------------------------------------|-----------------------------------------|------------|-------|
|                                   | $d\omega/dp$<br>(cm <sup>-1</sup> GPa <sup>-1</sup> ) | $\omega_0$<br>(cm <sup>-1</sup> ) | $d\omega/dp$<br>(cm <sup>-1</sup> GPa <sup>-1</sup> ) | $\omega_0$<br>(cm <sup>-1</sup> ) | $d\omega/dp$<br>(cm <sup>-1</sup> GPa <sup>-1</sup> ) | $\omega_0$<br>(cm <sup>-1</sup> )       |            |       |
| 3167.9                            | 6.51                                                  | 3171.2                            | 9.31                                                  | 3146.9                            | 13.85                                                 | vCH                                     |            |       |
|                                   |                                                       | 3174.1                            | 3.94                                                  | 3160.1                            | 6.64                                                  |                                         |            |       |
|                                   |                                                       |                                   |                                                       | 3172.8                            | 2.40                                                  |                                         |            |       |
| 3134.9                            | 7.35                                                  | 3141.2                            | 1.37                                                  | 3101.0                            | 9.23                                                  | vCH                                     |            |       |
|                                   |                                                       | 3155.8                            | -4.60                                                 | 3128.8                            | 0.49                                                  |                                         |            |       |
| 1440.8                            | 0.75                                                  | 1439.9                            | 1.65                                                  | 1417.3                            | 5.79                                                  | v <sub>φ</sub> + δNH + δNH <sup>+</sup> |            |       |
|                                   |                                                       | 1440.6                            | 0.84                                                  | 1416.6                            | 3.93                                                  |                                         |            |       |
|                                   |                                                       | 1418.0                            | 0.37                                                  | 1390.3                            | 5.29                                                  |                                         |            |       |
| 1190.2                            | 1.92                                                  | 1190.1                            | 3.61                                                  | 1183.1                            | 5.04                                                  | v <sub>φ</sub>                          |            |       |
|                                   |                                                       | 1189.1                            | 2.19                                                  | 1176.1                            | 4.48                                                  |                                         |            |       |
|                                   |                                                       | 1184.8                            | 1.04                                                  | 1172.0                            | 3.23                                                  |                                         |            |       |
| 1154.3                            | 2.94                                                  | 1165.5                            | 0.41                                                  | 1187.3                            | -3.25                                                 | δCH + v <sub>φ</sub>                    |            |       |
|                                   |                                                       | 1159.2                            | 0.22                                                  | 1183.8                            | -3.94                                                 |                                         |            |       |
| 1106.8                            | -1.63                                                 | 1104.6                            | 0.88                                                  | 1101.3                            | 1.39                                                  | δCH + v <sub>φ</sub>                    |            |       |
| 1044.8                            | -0.13                                                 | 1044.1                            | 1.59                                                  | 1037.4                            | 2.92                                                  | v <sub>φ</sub> + δCH                    |            |       |
|                                   |                                                       | 1041.6                            | -0.13                                                 | 1023.3                            | 3.00                                                  |                                         |            |       |
| 919.7                             | 0.45                                                  | 918.8                             | 0.42                                                  |                                   |                                                       | δ <sub>φ</sub>                          |            |       |
| 904.5                             | 1.88                                                  | 905.7                             | 1.36                                                  | 903.2                             | 1.94                                                  |                                         |            |       |
| 874.6                             | -2.13                                                 | 868.8                             | 0.92                                                  | 856.0                             | 4.53                                                  | γCH                                     |            |       |
|                                   |                                                       |                                   |                                                       | 891.1                             | -3.04                                                 |                                         |            |       |
| 767.1                             | 3.17                                                  | 763.7                             | 4.80                                                  | 761.2                             | 3.94                                                  | γNH + γNH <sup>+</sup>                  |            |       |
|                                   |                                                       | 751.5                             | 2.86                                                  |                                   |                                                       |                                         |            |       |
| 622.5                             | 1.67                                                  | 621.2                             | 1.52                                                  | 615.4                             | 2.57                                                  | v <sub>φ</sub>                          |            |       |
| 620.9                             | -0.31                                                 | 616.7                             | 1.41                                                  | 617.3                             | 1.50                                                  |                                         |            |       |
|                                   |                                                       | 614.4                             | 0.59                                                  | 618.4                             | -0.15                                                 |                                         |            |       |
| 108.5                             | 3.35                                                  | 163.5                             | 14.74                                                 | 207.2                             | 9.12                                                  | vPbBr                                   |            |       |
|                                   |                                                       | 131.5                             | 13.59                                                 | 145.1                             | 11.86                                                 |                                         |            |       |
|                                   |                                                       | 97.6                              | 8.11                                                  | 99.7                              | 8.21                                                  |                                         |            |       |
| 69.1                              | 10.73                                                 | 74.5                              | 7.11                                                  | 132.4                             | 3.13                                                  | vPbBr                                   |            |       |
|                                   |                                                       |                                   |                                                       |                                   |                                                       |                                         |            |       |
| 60.1                              | 2.52                                                  | 54.8                              | 1.37                                                  | 48.9                              | 7.21                                                  | δPbBr                                   |            |       |
|                                   |                                                       |                                   |                                                       | 55.2                              | 6.43                                                  |                                         | 85.8       | 1.66  |
|                                   |                                                       |                                   |                                                       | 52.1                              | 5.29                                                  |                                         | 102.7      | -2.83 |
|                                   |                                                       |                                   |                                                       |                                   |                                                       |                                         | 26.7       | 6.02  |
|                                   |                                                       |                                   |                                                       |                                   |                                                       |                                         | 50.0       | 2.63  |
|                                   |                                                       |                                   |                                                       |                                   |                                                       |                                         | 69.1       | -0.52 |

Key: δ, bending (scissoring); δ<sub>φ</sub>, in-plane ring bending; dω/dp, slope; γ<sub>φ</sub>, out-of-plane ring bending, v, stretching; v<sub>φ</sub>, ring stretching, ω<sub>0</sub>, intercept

**Table S9.** Factor group analysis for IM<sub>3</sub>PbBr<sub>5</sub>.

| Ion              | Free ion sym.<br>$C_{2v}$<br>( <i>mm2</i> ) | Site symmetry    |                              |                                                                       | Factor group symmetry            |                                        |                                                                    |                                                                       |
|------------------|---------------------------------------------|------------------|------------------------------|-----------------------------------------------------------------------|----------------------------------|----------------------------------------|--------------------------------------------------------------------|-----------------------------------------------------------------------|
|                  |                                             | III<br>$C_1$ (1) | II <sup>a</sup><br>$C_1$ (1) | I<br>$C_{2v}$ ( <i>mm2</i> )                                          | III<br>$C_1$ (1)                 | II <sup>a</sup><br>$C_i$ ( $\bar{1}$ ) | I<br>$D_{2h}$ ( <i>mmm</i> )                                       |                                                                       |
| IM <sup>+</sup>  | vNH <sup>+</sup>                            | A                | A                            |                                                                       | 3A                               | A <sub>g</sub> +A <sub>u</sub>         |                                                                    |                                                                       |
|                  | vNH                                         | A                | A                            |                                                                       | 3A                               | A <sub>g</sub> +A <sub>u</sub>         |                                                                    |                                                                       |
|                  | 3×vCH                                       | 3A               | 3A                           |                                                                       | 9A                               | 3A <sub>g</sub> +3A <sub>u</sub>       |                                                                    |                                                                       |
|                  | 5×v <sub>φ</sub>                            | 5A               | 5A                           |                                                                       | 15A                              | 5A <sub>g</sub> +5A <sub>u</sub>       |                                                                    |                                                                       |
|                  | δNH <sup>+</sup>                            | A                | A                            |                                                                       | 3A                               | A <sub>g</sub> +A <sub>u</sub>         |                                                                    |                                                                       |
|                  | δNH                                         | A                | A                            |                                                                       | 3A                               | A <sub>g</sub> +A <sub>u</sub>         |                                                                    |                                                                       |
|                  | 3×δCH                                       | 3A               | 3A                           | Structural disorder                                                   | 9A                               | 3A <sub>g</sub> +3A <sub>u</sub>       | Structural disorder (90) <sup>b</sup>                              |                                                                       |
|                  | 2×δ <sub>φ</sub>                            | 2A               | 2A                           |                                                                       | 6A                               | 2A <sub>g</sub> +2A <sub>u</sub>       |                                                                    |                                                                       |
|                  | γNH <sup>+</sup>                            | A                | A                            |                                                                       | 3A                               | A <sub>g</sub> +A <sub>u</sub>         |                                                                    |                                                                       |
|                  | γNH                                         | A                | A                            |                                                                       | 3A                               | A <sub>g</sub> +A <sub>u</sub>         |                                                                    |                                                                       |
|                  | 3×γCH                                       | 3A               | 3A                           |                                                                       | 9A                               | 3A <sub>g</sub> +3A <sub>u</sub>       |                                                                    |                                                                       |
|                  | 2×γ <sub>φ</sub>                            | 2A               | 2A                           |                                                                       | 6A                               | 2A <sub>g</sub> +2A <sub>u</sub>       |                                                                    |                                                                       |
|                  | T'                                          | 3A               | 3A                           |                                                                       | 9A                               | 3A <sub>g</sub> +3A <sub>u</sub>       |                                                                    |                                                                       |
| L                | 3A                                          | 3A               |                              | 9A                                                                    | 3A <sub>g</sub> +3A <sub>u</sub> |                                        |                                                                    |                                                                       |
|                  |                                             | $C_1$ (1)        | $C_1$ (1)                    | $D_{2h}$ ( <i>mmm</i> )                                               | $C_1$ (1)                        | $C_i$ ( $\bar{1}$ )                    | $D_{2h}$ ( <i>mmm</i> )                                            |                                                                       |
| Br <sup>-</sup>  | T'                                          | 15A              | 12A                          | 2A <sub>g</sub> +A <sub>u</sub> +2B <sub>1g</sub> +B <sub>1u</sub>    | 15A                              | 6A <sub>g</sub> +6A <sub>u</sub>       | 2A <sub>g</sub> +A <sub>u</sub> +2B <sub>1g</sub> +B <sub>1u</sub> |                                                                       |
|                  |                                             |                  | $C_i$ ( $\bar{1}$ )          | +B <sub>2g</sub> +2B <sub>2u</sub> +B <sub>3g</sub> +2B <sub>3u</sub> |                                  | $C_s$ ( <i>m</i> )                     | $C_i$ ( $\bar{1}$ )                                                | +B <sub>2g</sub> +2B <sub>2u</sub> +B <sub>3g</sub> +2B <sub>3u</sub> |
|                  |                                             |                  | 3A <sub>u</sub>              | B <sub>1u</sub> +B <sub>2u</sub> +B <sub>3u</sub>                     |                                  | 3A <sub>u</sub>                        | B <sub>1u</sub> +B <sub>2u</sub> +B <sub>3u</sub>                  |                                                                       |
|                  |                                             | $C_1$ (1)        | $C_i$ ( $\bar{1}$ )          | $D_{2h}$ ( <i>mmm</i> )                                               | $C_1$ (1)                        | $C_i$ ( $\bar{1}$ )                    | $D_{2h}$ ( <i>mmm</i> )                                            |                                                                       |
| Pb <sup>2+</sup> | T'                                          | 3A               | 3A <sub>u</sub>              | B <sub>1u</sub> +B <sub>2u</sub> +B <sub>3u</sub>                     | 3A                               | 3A <sub>u</sub>                        | B <sub>1u</sub> +B <sub>2u</sub> +B <sub>3u</sub>                  |                                                                       |

<sup>a</sup> for ordered molecules in the primitive cell (half); <sup>b</sup> total number of expected vibrational modes; key: IR-active; Raman-active; both IR- and Raman active; silent; v, stretching; v<sub>φ</sub>, ring stretching; δ, in-plane bending; δ<sub>φ</sub>, in-plane ring bending; γ, out-of-plane bending; γ<sub>φ</sub>, out-of-plane ring bending; T', translation; L, libration.

**Table S10.** IR and Raman bands (cm<sup>-1</sup>) of IM<sub>3</sub>PbBr<sub>5</sub> together with relative intensity and assignments.

| Raman                                                        | IR                                                                             | Assignment                              |
|--------------------------------------------------------------|--------------------------------------------------------------------------------|-----------------------------------------|
| 3244 <sub>b,vw</sub>                                         | 3255 <sub>b,s</sub>                                                            | vNH + vNH <sup>+</sup>                  |
| 3171 <sub>vw</sub> , 3135 <sub>vw</sub> , 3110 <sub>sh</sub> | 3144 <sub>sh</sub> , 3123 <sub>m</sub> , 3099 <sub>m</sub>                     | vCH                                     |
| 3031 <sub>vw</sub> , 2996 <sub>vw</sub>                      | 2998 <sub>sh</sub> , 2982 <sub>w</sub>                                         | vNH + vNH <sup>+</sup>                  |
|                                                              | 2875 <sub>w</sub> , 2844 <sub>w</sub> , 1747 <sub>vw</sub> , 1630 <sub>w</sub> | overtones                               |
| 1580 <sub>w</sub>                                            | 1579 <sub>m</sub>                                                              | v <sub>φ</sub>                          |
| 1528 <sub>vw</sub>                                           | 1526 <sub>vw</sub> , 1497 <sub>sh</sub>                                        | δCH + v <sub>φ</sub>                    |
| 1442 <sub>m</sub> , 1421 <sub>sh</sub>                       | 1441 <sub>sh</sub> , 1417 <sub>w</sub>                                         | v <sub>φ</sub> + δNH + δNH <sup>+</sup> |
| 1239 <sub>vw</sub>                                           | 1307 <sub>vw</sub>                                                             | δCH                                     |
| 1192 <sub>m</sub> , 1173 <sub>vw</sub>                       | 1191 <sub>vw</sub>                                                             | v <sub>φ</sub>                          |
| 1158 <sub>vw</sub> , 1109 <sub>vw</sub>                      | 1157 <sub>vw</sub> , 1114 <sub>vw</sub>                                        | δCH + v <sub>φ</sub>                    |
| 1088 <sub>sh</sub> , 1084 <sub>w</sub>                       | 1089 <sub>w</sub> , 1084 <sub>sh</sub>                                         | v <sub>φ</sub>                          |
| 1046 <sub>w</sub>                                            | 1045 <sub>m</sub>                                                              | v <sub>φ</sub> + δCH                    |
| 921 <sub>vw</sub> , 906 <sub>vw</sub>                        | 921 <sub>vw</sub>                                                              | δ <sub>φ</sub>                          |
| 874 <sub>vw</sub>                                            | 874 <sub>vw</sub>                                                              | γCH                                     |
| 767 <sub>vw</sub>                                            | 763 <sub>m</sub>                                                               | γNH + γNH <sup>+</sup>                  |
| 623 <sub>vw</sub>                                            | 621 <sub>sh</sub> , 618 <sub>m</sub>                                           | γ <sub>φ</sub>                          |
| 138 <sub>sh</sub>                                            | 135 <sub>sh</sub>                                                              | vPbBr                                   |
| 110 <sub>s</sub>                                             | 111 <sub>s</sub>                                                               | vPbBr + T'                              |
| 74 <sub>sh</sub>                                             | 81 <sub>vs</sub>                                                               | δPbBr + L                               |
| 61 <sub>vs</sub>                                             | 69 <sub>vs</sub>                                                               | δPbBr + T' + L                          |

Key: broad, b; very strong, vs; strong, s; medium, m; weak, w; very weak, vw; v, stretching; v<sub>φ</sub>, ring stretching; δ, in-plane bending; δ<sub>φ</sub>, in-plane ring bending; γ, out-of-plane bending; γ<sub>φ</sub>, out-of-plane ring bending; T', translation; L, libration.

**Table S11.** Linear fitting results of pressure-dependencies of Raman bands of IM<sub>3</sub>PbBr<sub>5</sub>.

|                                   | III                                                   |                                   | IV                                                    |                                   | V                                                     |  | Assignment                                               |
|-----------------------------------|-------------------------------------------------------|-----------------------------------|-------------------------------------------------------|-----------------------------------|-------------------------------------------------------|--|----------------------------------------------------------|
| $\omega_0$<br>(cm <sup>-1</sup> ) | $d\omega/dp$<br>(cm <sup>-1</sup> GPa <sup>-1</sup> ) | $\omega_0$<br>(cm <sup>-1</sup> ) | $d\omega/dp$<br>(cm <sup>-1</sup> GPa <sup>-1</sup> ) | $\omega_0$<br>(cm <sup>-1</sup> ) | $d\omega/dp$<br>(cm <sup>-1</sup> GPa <sup>-1</sup> ) |  |                                                          |
| 3288.5                            | -9.16                                                 | 3293.9                            | -6.28                                                 |                                   |                                                       |  | $\nu_{\text{NH}} + \nu_{\text{NH}^+}$                    |
| 3169.1                            | 8.15                                                  | 3174.4                            | 5.94                                                  | 3177.4                            | 5.46                                                  |  | $\nu_{\text{CH}}$                                        |
| 3139.5                            | 2.87                                                  | 3149.6                            | -1.22                                                 | 3130.0                            | 1.69                                                  |  | $\nu_{\text{CH}}$                                        |
| 3124.2                            | 1.85                                                  |                                   |                                                       |                                   |                                                       |  | $\nu_{\text{CH}}$                                        |
| 1440.8                            | 10.42                                                 | 1444.6                            | 5.87                                                  | 1448.8                            | 5.63                                                  |  | $\nu_{\phi} + \delta_{\text{NH}} + \delta_{\text{NH}^+}$ |
| 1440.7                            | 0.76                                                  | 1438.8                            | 1.97                                                  |                                   |                                                       |  |                                                          |
|                                   |                                                       | 1186.4                            | 4.17                                                  | 1184.8                            | 4.83                                                  |  | $\nu_{\phi}$                                             |
| 1191.3                            | 1.61                                                  | 1191.3                            | 1.59                                                  | 1191.3                            | 2.81                                                  |  |                                                          |
|                                   |                                                       |                                   |                                                       | 1182.0                            | 2.98                                                  |  |                                                          |
|                                   |                                                       | 1158.5                            | 2.33                                                  | 1165.7                            | 1.43                                                  |  | $\delta_{\text{CH}} + \nu_{\phi}$                        |
| 1154.0                            | 4.06                                                  | 1161.5                            | 0.55                                                  | 1154.1                            | 1.74                                                  |  |                                                          |
|                                   |                                                       | 1102.4                            | 2.73                                                  | 1108.4                            | 2.07                                                  |  | $\delta_{\text{CH}} + \nu_{\phi}$                        |
| 1108.0                            | -0.99                                                 | 1104.7                            | 1.71                                                  | 1091.4                            | 3.16                                                  |  |                                                          |
|                                   |                                                       | 1048.0                            | 0.64                                                  | 1019.6                            | 5.27                                                  |  | $\nu_{\phi} + \delta_{\text{CH}}$                        |
| 1045.8                            | 0.41                                                  | 1043.0                            | 0.58                                                  | 1034.3                            | 2.09                                                  |  |                                                          |
| 921.5                             | 0.04                                                  | 918.1                             | 1.71                                                  | 917.6                             | 2.29                                                  |  | $\delta_{\phi}$                                          |
| 905.3                             | 1.36                                                  | 904.7                             | 1.73                                                  | 904.8                             | 2.00                                                  |  |                                                          |
|                                   |                                                       |                                   |                                                       | 902.3                             | 1.67                                                  |  |                                                          |
| 875.3                             | 4.59                                                  | 873.8                             | 4.62                                                  | 864.2                             | 4.08                                                  |  | $\gamma_{\text{CH}}$                                     |
| 867.5                             | -3.94                                                 | 863.6                             | -0.73                                                 | 847.6                             | 1.26                                                  |  |                                                          |
|                                   |                                                       | 765.6                             | 4.64                                                  | 753.2                             | 7.98                                                  |  | $\gamma_{\text{NH}} + \gamma_{\text{NH}^+}$              |
| 770.2                             | 2.81                                                  |                                   |                                                       | 750.8                             | 5.72                                                  |  |                                                          |
|                                   |                                                       |                                   |                                                       | 753.8                             | 2.15                                                  |  |                                                          |
| 734.5                             | 1.85                                                  | 722.5                             | 6.01                                                  | 736.3                             | 1.67                                                  |  |                                                          |
| 624.5                             | 2.31                                                  | 624.3                             | 2.49                                                  | 612.6                             | 3.57                                                  |  | $\gamma_{\phi}$                                          |
| 621.3                             | 0.86                                                  | 620.5                             | 1.30                                                  | 606.4                             | 2.94                                                  |  |                                                          |
| 153.5                             | 10.39                                                 | 160.1                             | 18.23                                                 |                                   |                                                       |  | $\nu_{\text{PbBr}}$                                      |
|                                   |                                                       | 119.0                             | 6.37                                                  | 110.7                             | 8.58                                                  |  | $\nu_{\text{PbBr}}$                                      |
| 118.8                             | 7.02                                                  | 131.2                             | 1.61                                                  |                                   |                                                       |  |                                                          |
| 78.2                              | 11.36                                                 | 82.9                              | 7.46                                                  |                                   |                                                       |  | $\delta_{\text{PbBr}}$                                   |
|                                   |                                                       | 58.1                              | 7.39                                                  | 57                                | 7.75                                                  |  | $\delta_{\text{PbBr}}$                                   |
| 62.2                              | 6.18                                                  | 40.7                              | 7.01                                                  | 52.2                              | 5.81                                                  |  |                                                          |

Key:  $\delta$ , bending (scissoring);  $\delta_{\phi}$ , in-plane ring bending;  $d\omega/dp$ , slope;  $\gamma_{\phi}$ , out-of-plane ring bending,  $\nu$ , stretching;  $\nu_{\phi}$ , ring stretching,  $\omega_0$ , intercept.
